# Supplementary material
Source: publisher site journal article supplement (https://www.dovepress.com/article/263747)
Supplement: Supplementary file 1 [file get_supplementary_file.php]

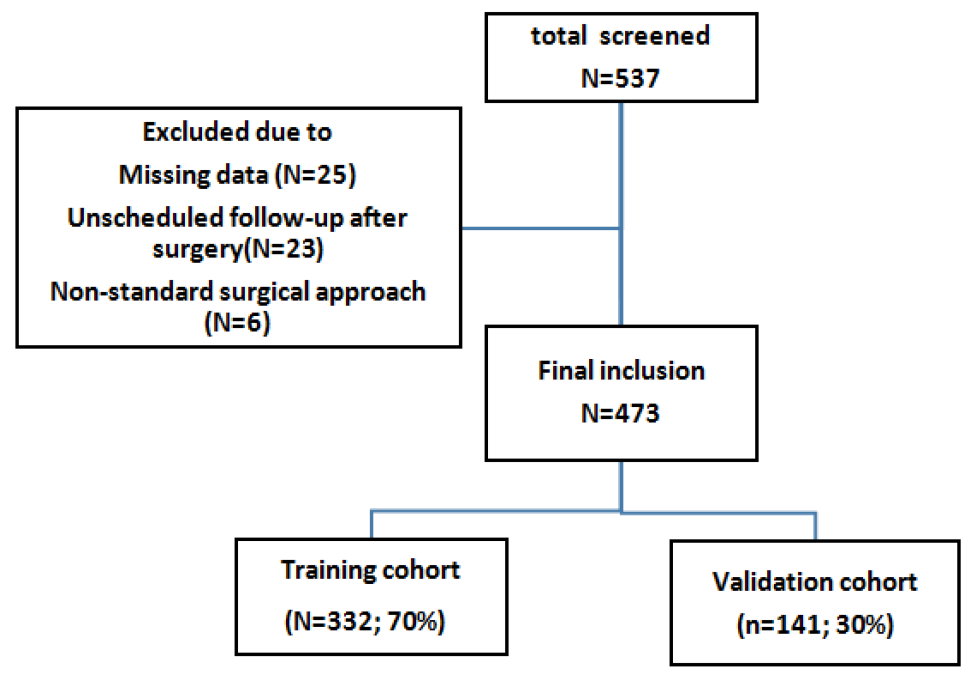


Supplementary figure: Flow chart for patient inclusion

**Supplementary table: Recurrence characteristics and follow-up**

| **Variable** | **Training cohort**  **N = 332** | **%** | **Validation cohort**  **N = 141** | **%** | **P value** |
| --- | --- | --- | --- | --- | --- |
| **Recurrence** | 47 | 14.2 | 20 | 14.2 | 0.994 |
| Vaginal stump | 1 | 2.1 | 1 | 5.0 | 0.964 |
| Central pelvic region | 7 | 14.9 | 3 | 15.0 |  |
| Lymph nodes (pelvic/para-aortic) | 10 | 21.3 | 5 | 25.0 |  |
| Peritoneal carcinomatosis | 10 | 21.3 | 4 | 20.0 |  |
| Distant metastases | 19 | 40.4 | 7 | 35.0 |  |
| **RFS (months)** |  |  |  |  |  |
| Median | 12.00 |  | 12.00 |  | 0.907 |
| Range | 3-48 |  | 2-47 |  |  |
| **Follow-up (months)** |  |  |  |  |  |
| Median | 27.00 |  | 25 |  | 0.691 |
| Range | 7-60 |  | 7-60 |  |  |
| Abbreviations: RFS= recurrence-free survival | | | | | |
